# Supplementary material for: Effects of Interactions between ZnO Nanoparticles and Saccharides on Biological Responses
Source: MDPI journal article supplement (doi:10.3390/ijms19020486), 2018-02-06
Supplement: s1 [file s1]

# Effects of Interactions between ZnO Nanoparticles and Saccharides on Biological Responses

Mi-Ran Go, Jin Yu, Song-Hwa Bae, Hyeon-Jin Kim and Soo-Jin Choi \*

Major of Food Science & Technology, Department of Applied Food System, Seoul Women's University, Seoul 01797, Korea; miran8190@naver.com (M.-R.G.); ky5031@swu.ac.kr (J.Y.); songhwa29@naver.com (S.-H.B.); kimhj043@naver.com (H.-J.K.)

\* Correspondence: sjchoi@swu.ac.kr; Tel.: +82-2-970-5634; Fax: +82-2-970-5977

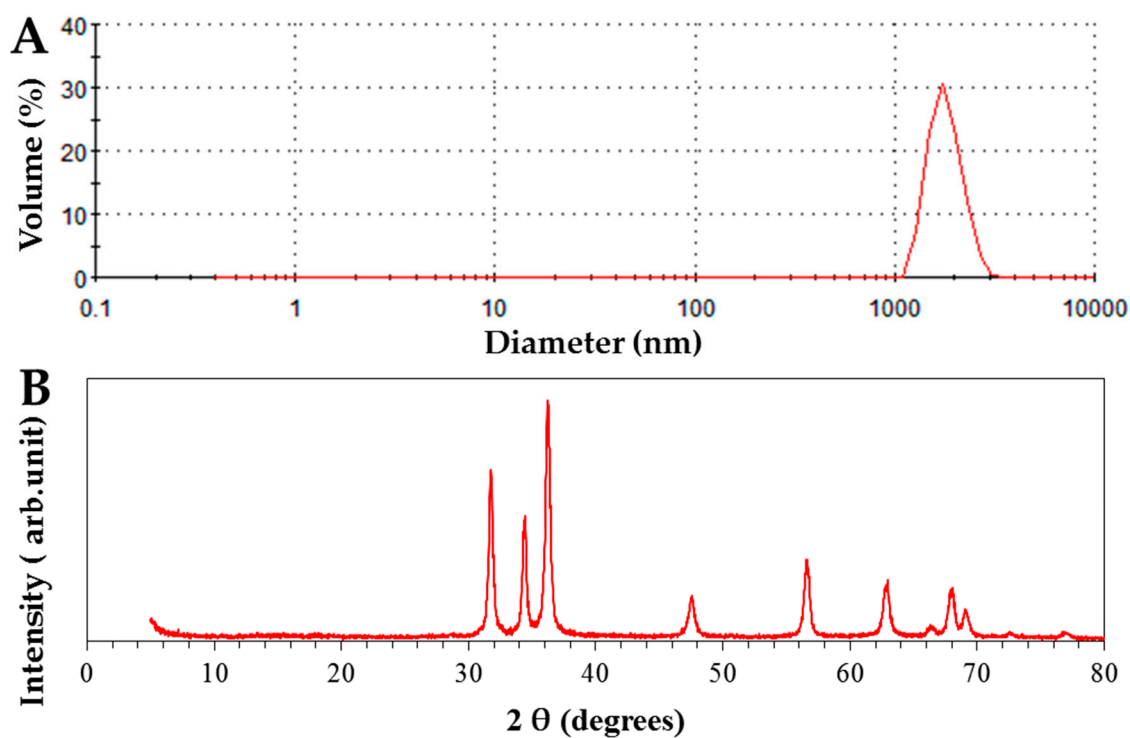

**Figure S1.** (A) Hydrodynamic particle size distribution and (B) powder X-ray diffraction (XRD) pattern of ZnO NPs.

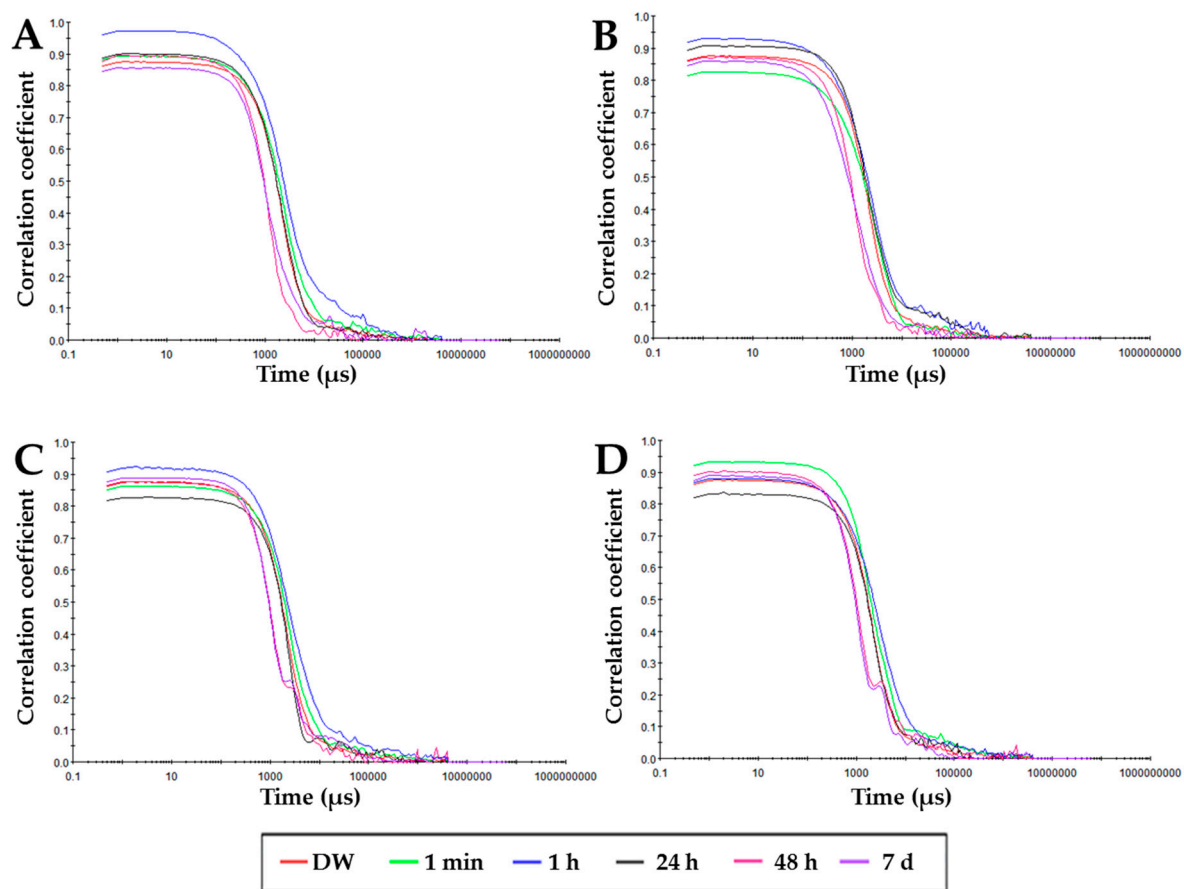

**Figure S2.** Correlation functions of DLS studies of ZnO NPs in (A) 1%, (B) 2%, and (C) 5%, and (D) 10% honey.

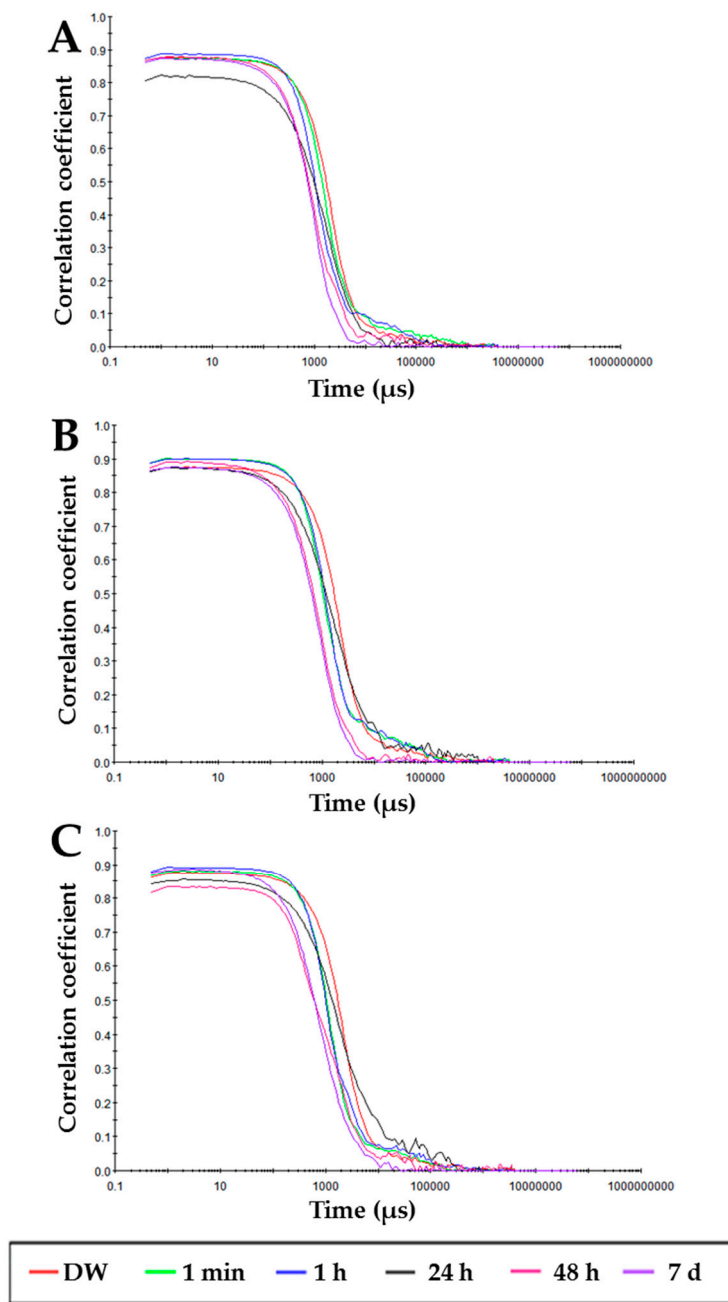

**Figure S3.** Correlation functions of DLS studies of ZnO NPs in (A) 1%, (B) 2%, and (C) 5% sugar mixture.

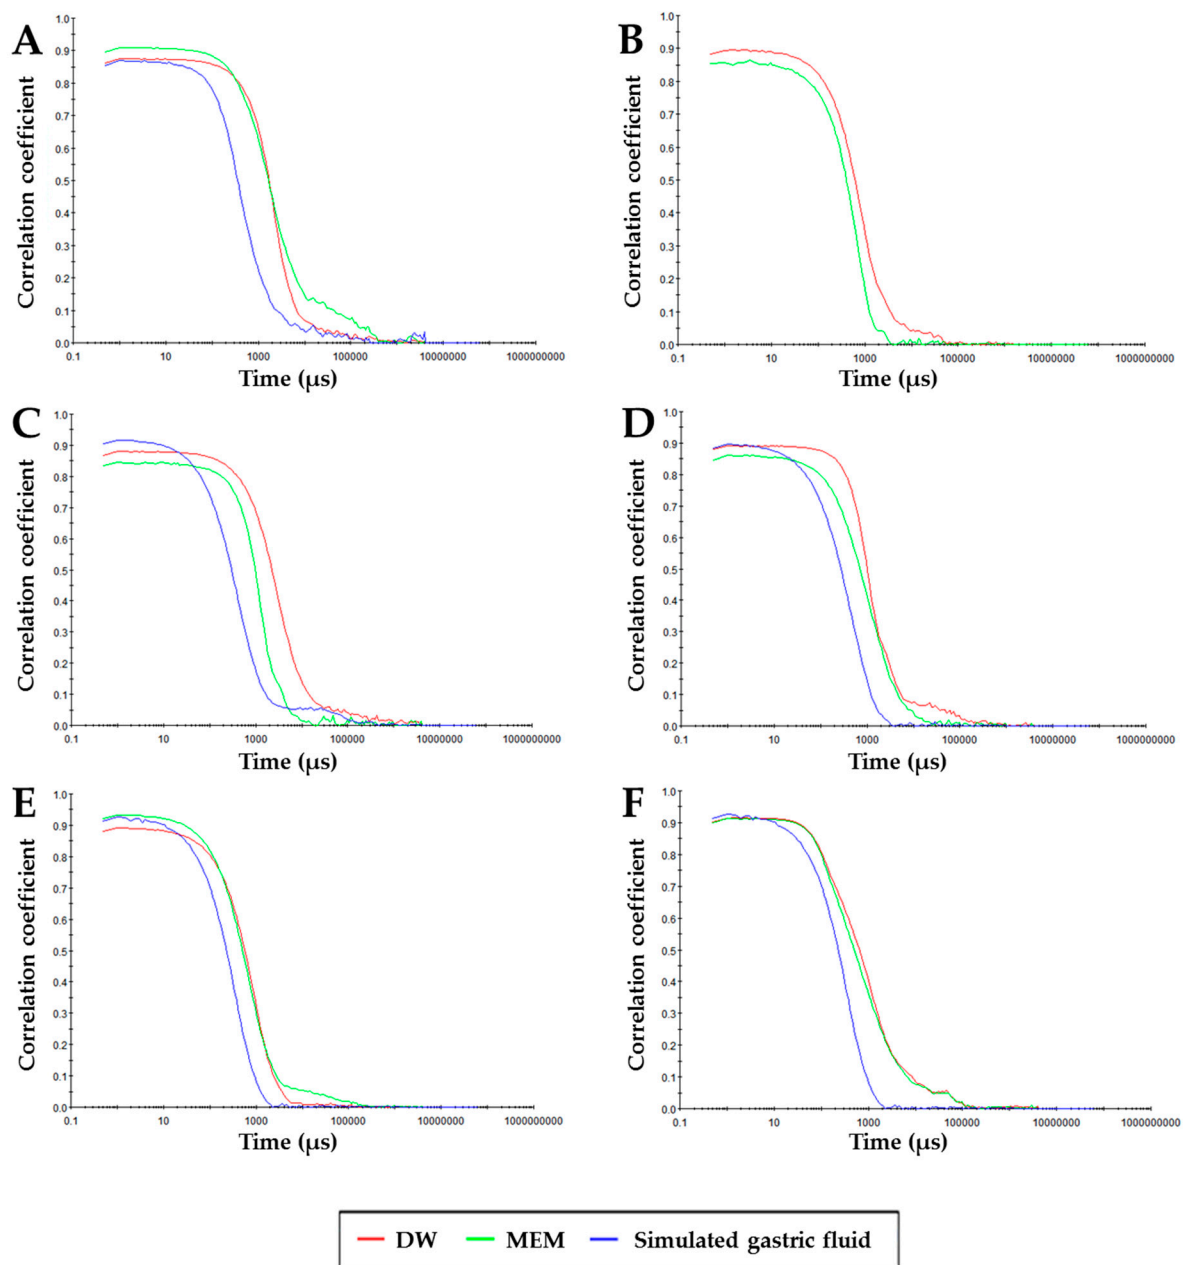

**Figure S4.** Correlation functions of DLS studies of ZnO NPs dispersed in (A) DW, (B) minimum essential medium (MEM), (C) 10% honey, (D) 5% sugar mixture, (E) 5% fructose, and (F) 5% glucose for 1 h, and then, measured in biological fluids (MEM and simulated gastric fluid) or DW as a control.

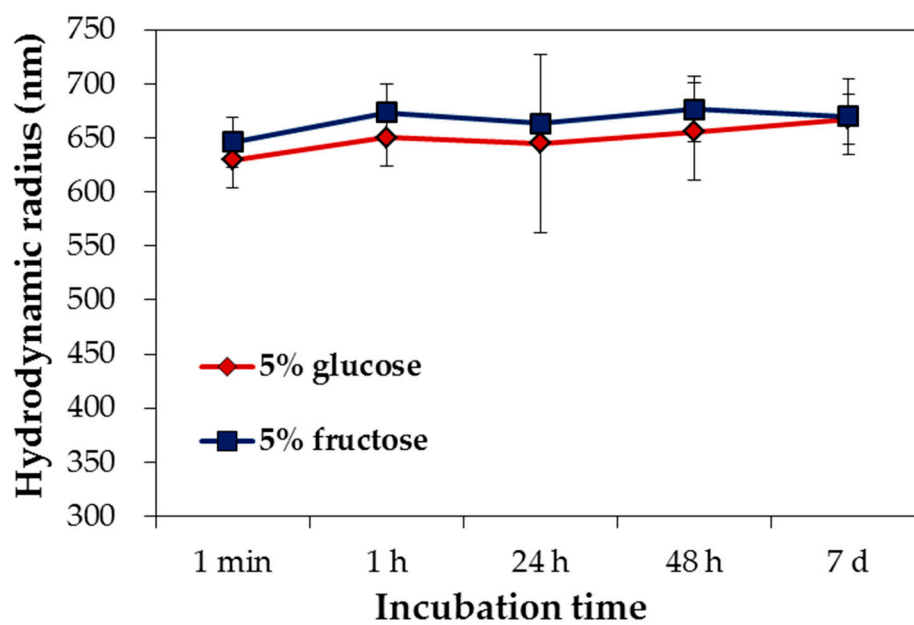

Figure S5. Hydrodynamic radii of ZnO NPs in 5% glucose and 5% fructose solutions for 7 days.

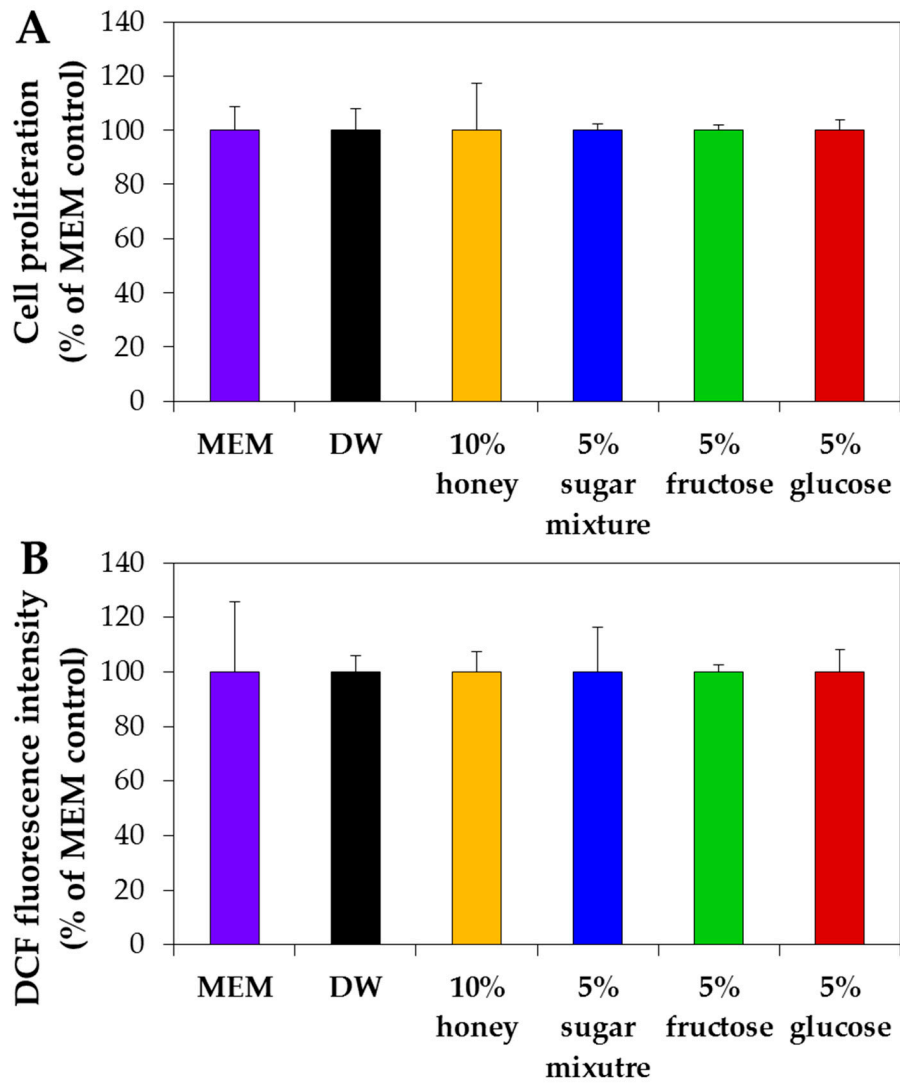

**Figure S6.** Effect of DW or different saccharide solutions on (A) Caco-2 cell proliferation and (B) intracellular ROS generation after 24 h.
